# Supplementary material
Source: PubMed Central journal article supplement (PMC137901)

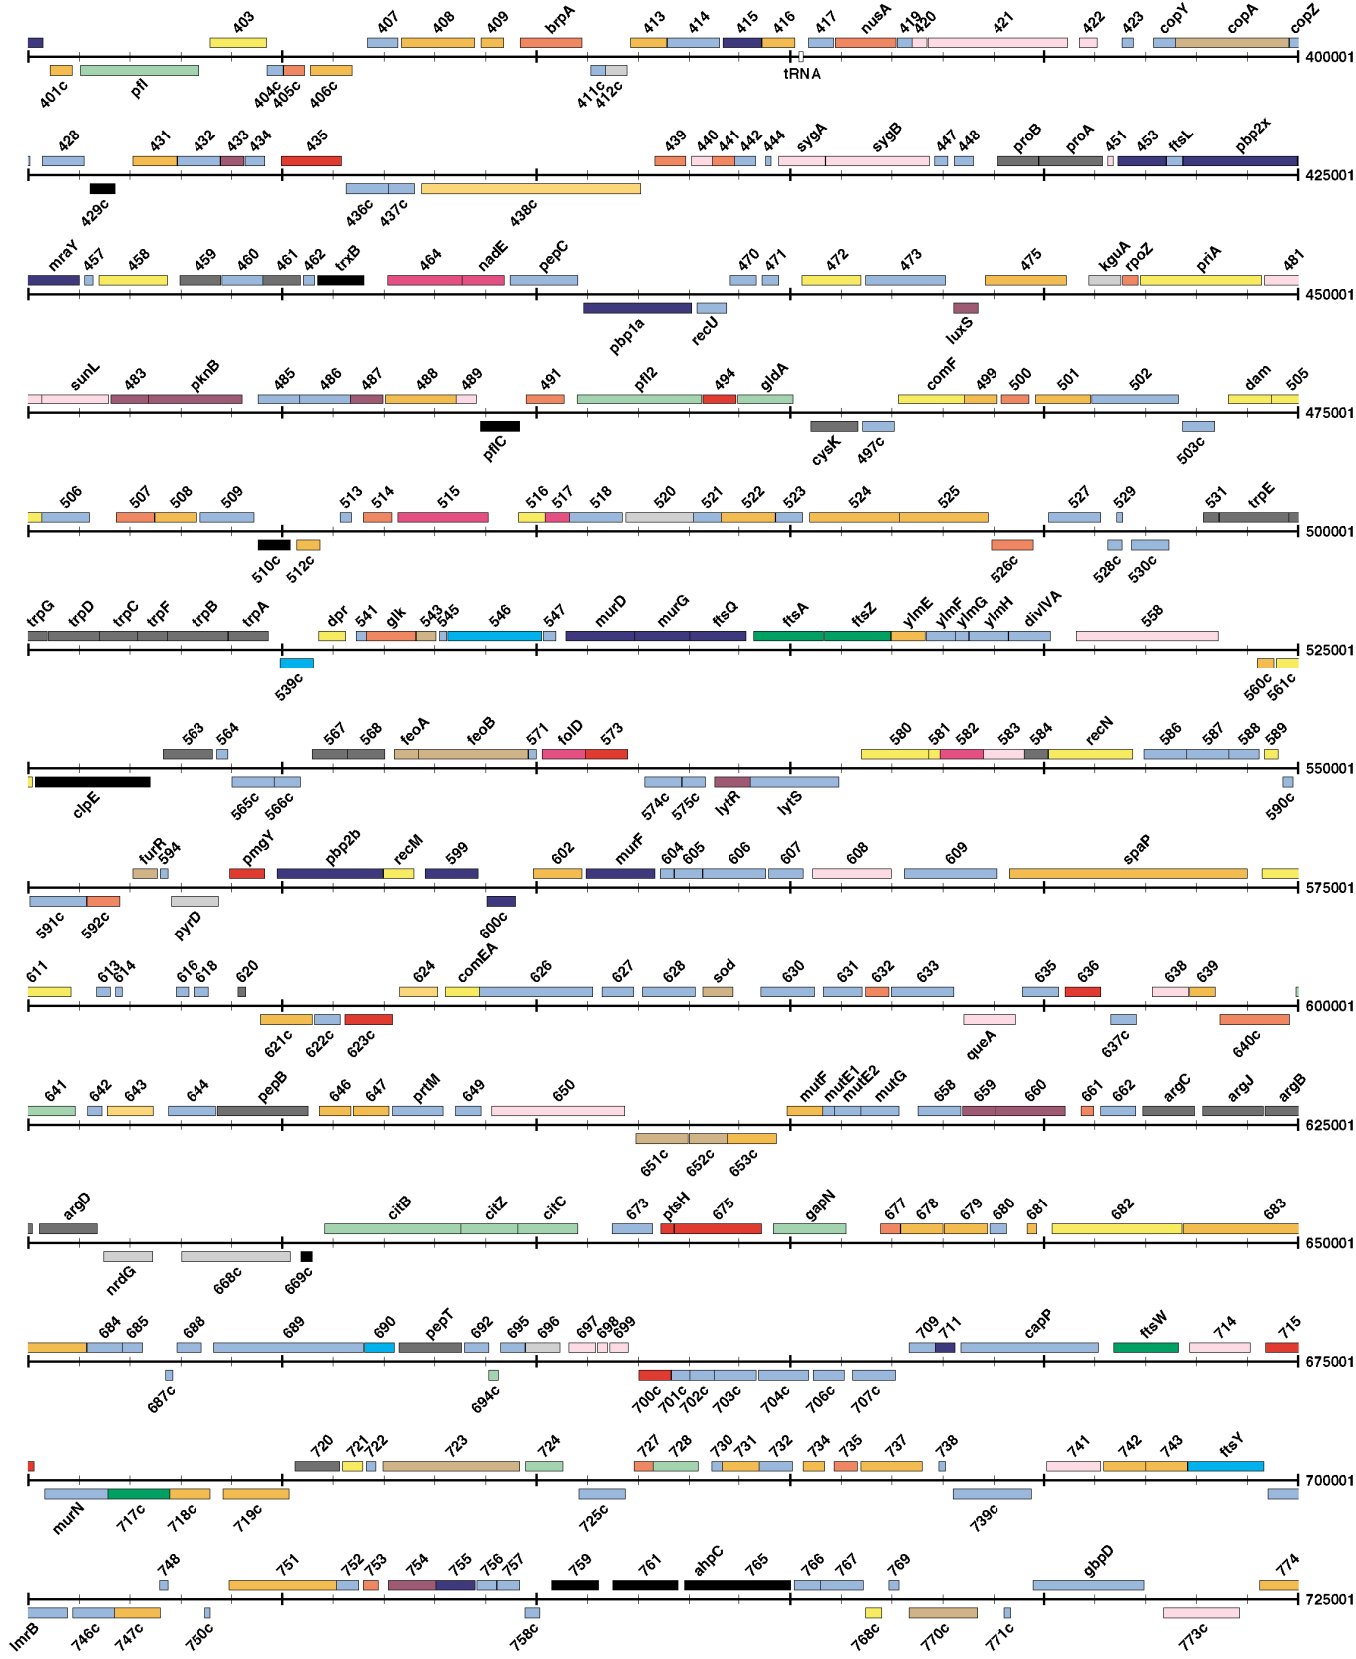

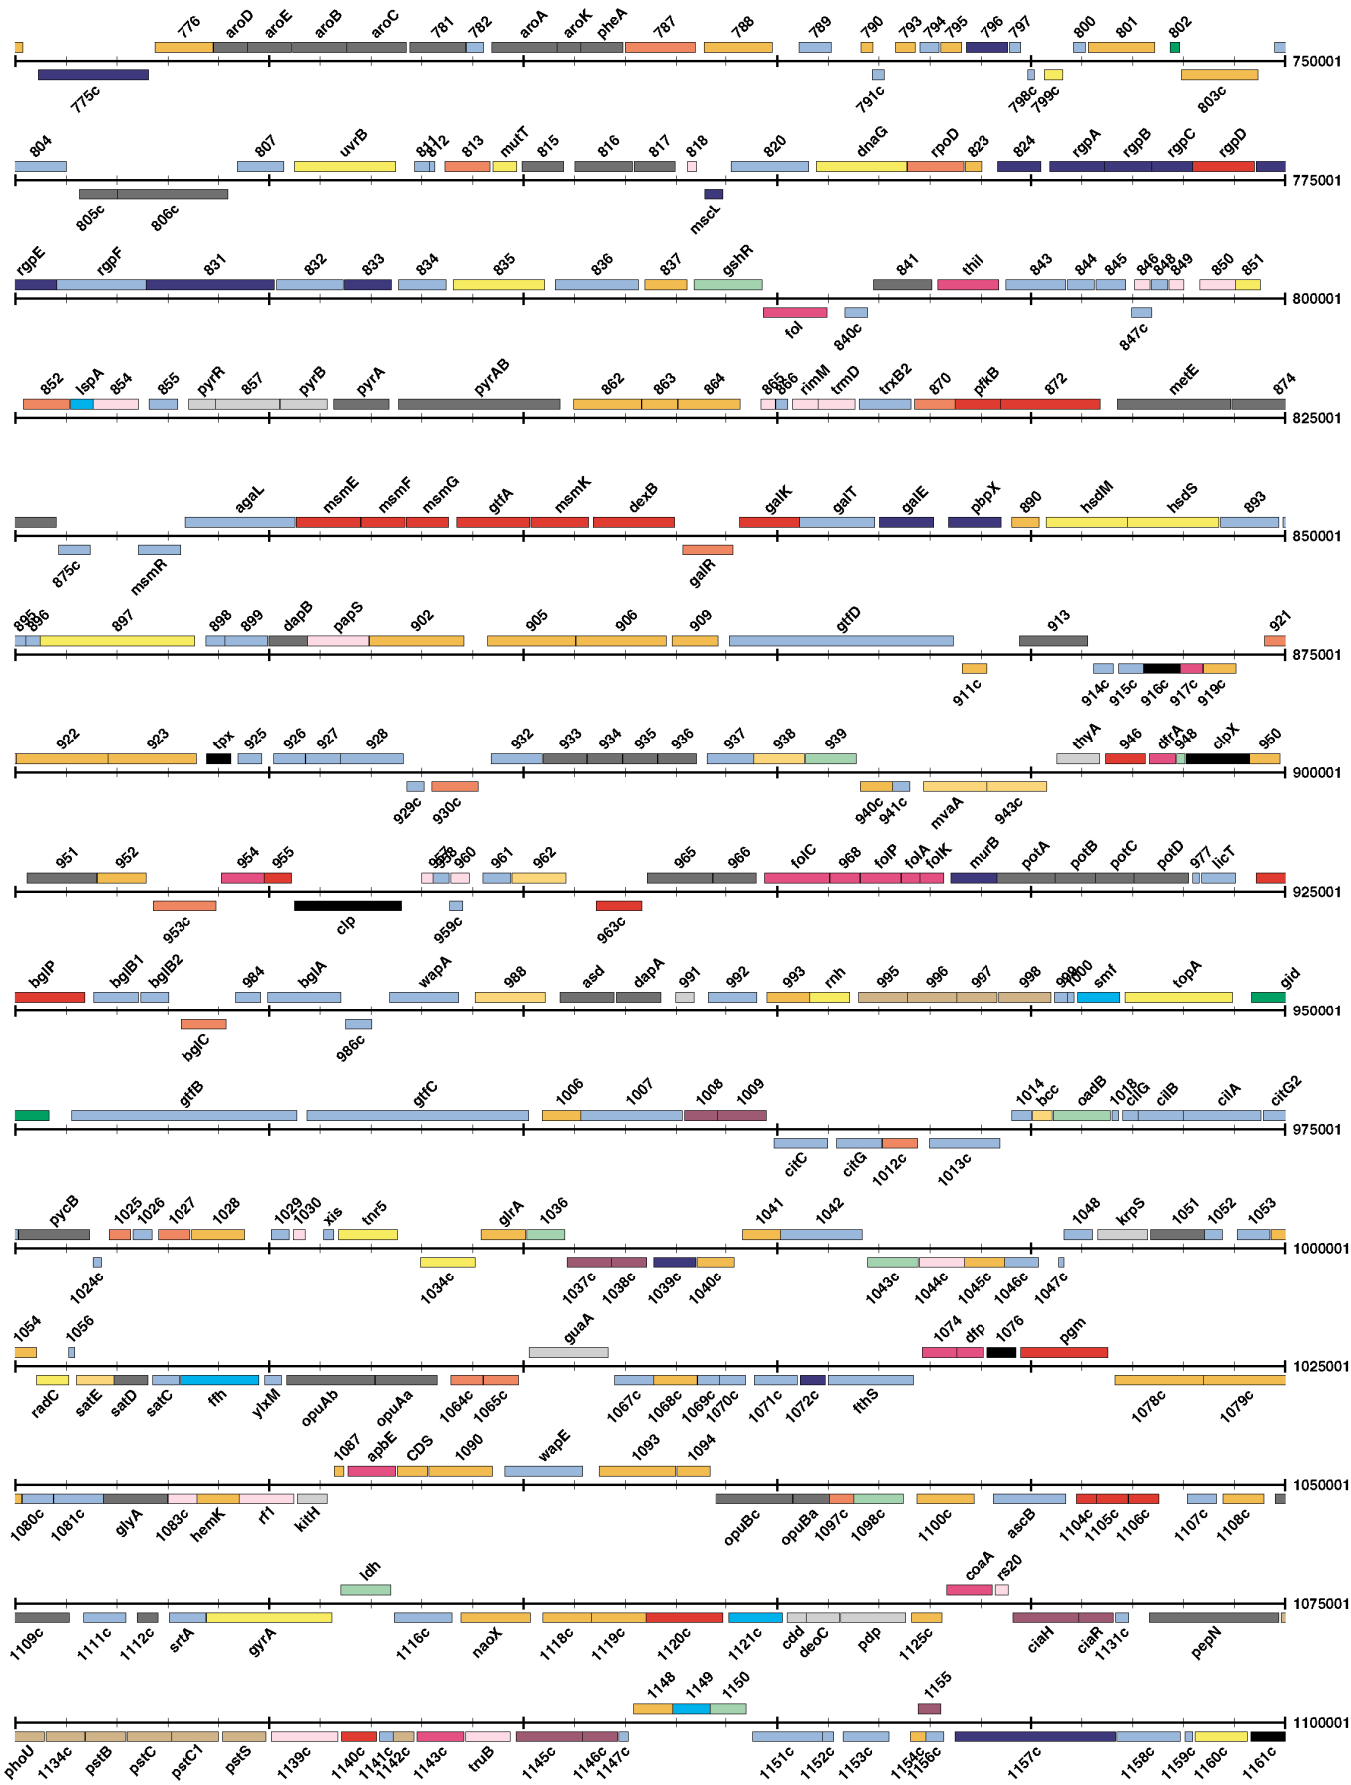

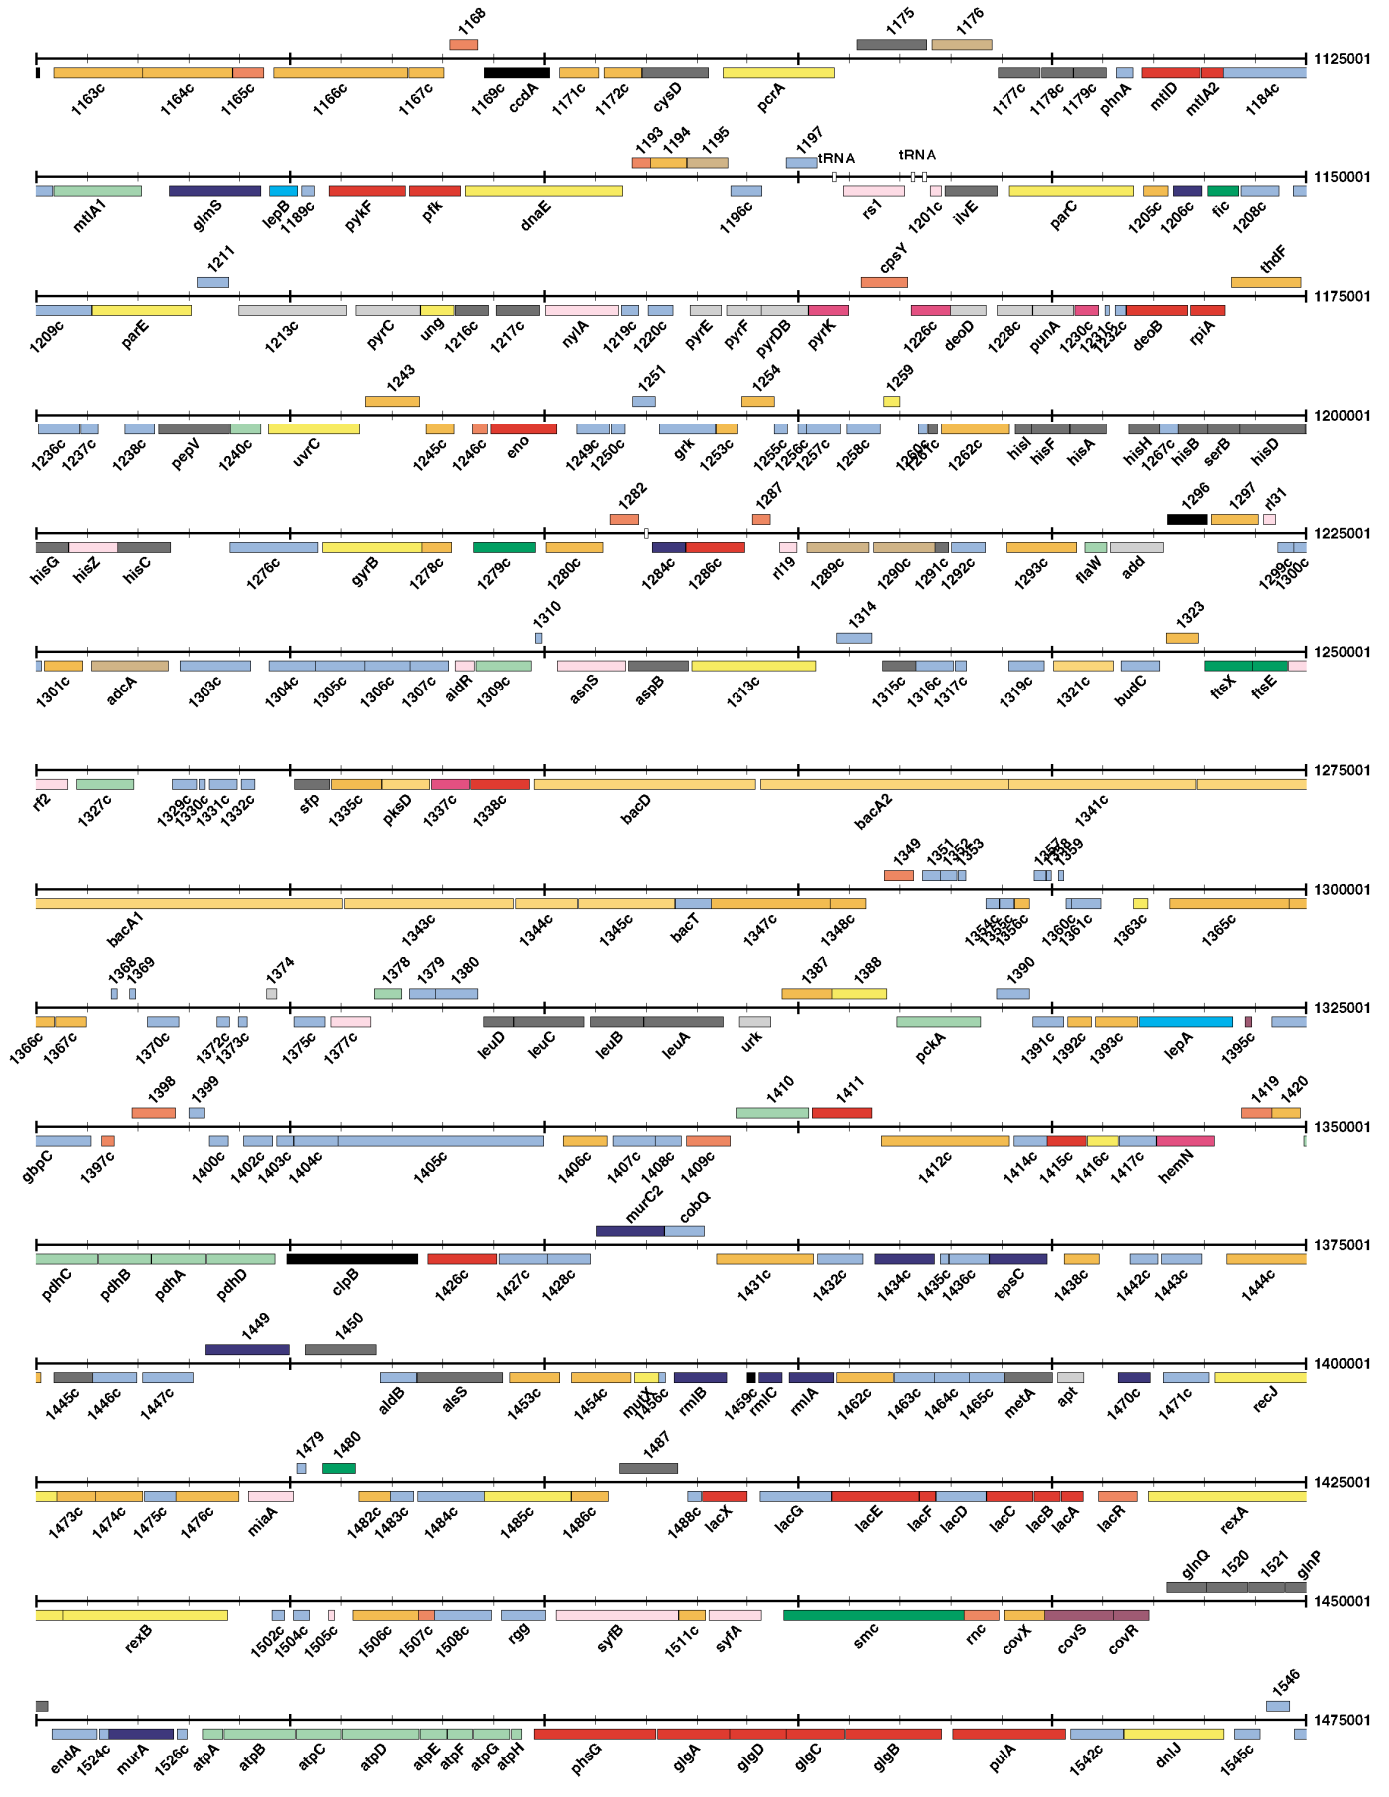

Supplement: pnas_172501299_10.pdf [file pnas_172501299_10.pdf]
